# Supplementary material for: Anti-RBD IgA and IgG Response and Transmission in Breast Milk of Anti-SARS-CoV-2 Vaccinated Mothers
Source: MDPI journal article supplement (doi:10.3390/pathogens11030286), 2022-02-24
Supplement: s1 [file s1]

Table S1. Data regarding the study group

| No | IgA 1st sample | IgA 2nd sample | IgG 1st sample | IgG 2nd sample | Vaccine | Date of vaccination | Date of child birth | Child's age at the time of vaccination | Child's age at the time of 1st sampling | Child's age at the time of 2nd sampling | Parity | Mother's age |
|----|----------------|----------------|----------------|----------------|---------|---------------------|---------------------|----------------------------------------|-----------------------------------------|-----------------------------------------|--------|--------------|
| 1  | 183.12         | 471.76         | 2953.6         | 328.51         | Pfizer  | 24.04.2021          | 5.01.2021           | 91                                     | 10                                      | 11                                      | 1      | 30           |
| 2  | 271.75         | 235.31         | 45.313         | 46.656         | Pfizer  | 17.01.2021          | 12.02.2019          | 231                                    | 24                                      | 25                                      | 1      | 31           |
| 3  | 109.28         | 94.605         | 22.962         | 39.435         | Moderna | 16.03.2021          | 27.10.2020          | 41                                     | 5                                       | 6                                       | 1      | 38           |
| 4  | 84.872         | 64.435         | 523.59         | 72.057         | Pfizer  | 10.02.2021          | 1.12.2020           | 21                                     | 3                                       | 4                                       | 2      | 33           |
| 5  | 2621           | 2465           | 156.09         | 68.026         | Pfizer  | 10.02.2021          | 10.01.2019          | 251                                    | 26                                      | 27                                      | 1      | 31           |
| 6  | 277.69         | 467.08         | 58.678         | 52.169         | Pfizer  | 1.02.2021           | 20.10.2020          | 31                                     | 4                                       | 5                                       | 2      | 36           |
| 7  | 181.11         | 158.4          | 49.191         | 51.241         | Pfizer  | 18.02.2021          | 1.12.2020           | 21                                     | 3                                       | 4                                       | 2      | 33           |
| 8  | 946.33         | 931.49         | 783.22         | 146.6          | Pfizer  | 5.02.2021           | 31.03.2018          | 331                                    | 34                                      | 35                                      | 1      | 31           |
| 9  | 510.55         | 624.02         | 56.499         | 67.349         | Pfizer  | 2.02.2021           | 3.02.2020           | 121                                    | 13                                      | 14                                      | 2      | 34           |
| 10 | 992.06         | 720            | 71.921         | 56.506         | Pfizer  | 7.02.2021           | 18.02.2018          | 351                                    | 36                                      | 37                                      | 1      | 31           |
| 11 | 1080           | 1511.3         | 59.776         | 102.28         | Pfizer  | 25.01.2021          | 3.06.2019           | 191                                    | 20                                      | 21                                      | 1      | 35           |
| 12 | 171.4          | 243.45         | 59.776         | 55.635         | Pfizer  | 21.02.2021          | 13.10.2020          | 41                                     | 5                                       | 6                                       | 2      | 34           |
| 13 | 147.35         | 137.8          | 55.311         | 54.391         | Pfizer  | 11.02.2021          | 10.04.2020          | 101                                    | 11                                      | 12                                      | 1      | 32           |
| 14 | 151.37         | 412.04         | 49.939         | 77.774         | Pfizer  | 7.04.2021           | 4.06.2020           | 101                                    | 11                                      | 12                                      | 1      | 32           |
| 15 | 4161.707       | 4159.966       | 11206.34768    | 11221.61956    | Pfizer  | 3.04.2021           | 28.06.2021          | 341                                    | 35                                      | 36                                      | 1      | 32           |
| 16 | 1271.5         | 1916.6         | 172.73         | 872.17         | Pfizer  | 25.04.2021          | 04.10.2019          | 181                                    | 19                                      | 20                                      | 1      | 29           |
| 17 | 467.31         | 371.09         | 74.268         | 59.873         | Pfizer  | 28.01.2021          | 14.05.2019          | 201                                    | 21                                      | 22                                      | 2      | 35           |
| 18 | 185.95         | 331.97         | 70.166         | 97.388         | Pfizer  | 18.05.2021          | 16.05.2020          | 121                                    | 13                                      | 14                                      | 2      | 35           |
| 19 | 701.26         | 407.89         | 90.618         | 74.101         | Moderna | 12.03.2021          | 16.01.2021          | 21                                     | 3                                       | 4                                       | 3      | 37           |
| 20 | 139.92         | 166.01         | 59.484         | 51.17          | Pfizer  | 29.02.2021          | 20.03.2020          | 111                                    | 12                                      | 13                                      | 1      | 34           |
| 21 | 98.788         | 97.168         | 54.219         | 69.018         | Pfizer  | 31.03.2021          | 21.11.2020          | 41                                     | 5                                       | 6                                       | 1      | 32           |
| 22 | 134.28         | 135.19         | 52.308         | 53.624         | Pfizer  | 14.02.2021          | 21.10.2020          | 31                                     | 4                                       | 5                                       | 1      | 30           |
| 23 | 350.62         | 485.84         | 82.721         | 57.669         | Pfizer  | 9.02.2021           | 13.04.2019          | 221                                    | 23                                      | 24                                      | 1      | 30           |
| 24 | 699.82         | 197.47         | 81.983         | 85.832         | Pfizer  | 9.02.2021           | 25.10.2019          | 151                                    | 16                                      | 17                                      | 1      | 35           |
| 25 | 404.82         | 197.24         | 86.606         | 63.9           | Moderna | 14.03.2021          | 13.07.2020          | 81                                     | 9                                       | 10                                      | 2      | 36           |
| 26 | 3805.148       | 3123.4         | 151.75         | 130.14         | Pfizer  | 30.01.2021          | 12.08.2019          | 171                                    | 18                                      | 19                                      | 1      | 34           |
